# Supplementary material for: Antibacterial, Antibiofilm and Anti-Virulence Activity of Biactive Fractions from Mucus Secretion of Giant African Snail Achatina fulica against Staphylococcus aureus Strains
Source: MDPI journal article supplement (doi:10.3390/antibiotics10121548), 2021-12-17
Supplement: s1 [file s1]

## Supporting information

# Antibacterial, Antibiofilm and Anti-virulence Activity of Biactive Fractions from Mucus Secretion of Giant African Snail *Achatina fulica* against *Staphylococcus aureus* Strains

Libardo Suárez <sup>1,2</sup>, Andrés Pereira <sup>2</sup>, William Hidalgo <sup>1,\*</sup> and Nelson Uribe <sup>2</sup>

<sup>1</sup> Grupo de Investigación en Bioquímica y Microbiología (GIBIM), Escuela de Química, Universidad Industrial de Santander, Edificio Camilo Torres 202, Bucaramanga 680002, Colombia; libardo2178128@correo.uis.edu.co

<sup>2</sup> Grupo de Inmunología y Epidemiología Molecular (GIEM), Escuela de Microbiología, Facultad de Salud, Universidad Industrial de Santander, Bucaramanga 680002, Colombia; andres.pereira@correo.uis.edu.co (A.P.); nelurdel@uis.edu.co (N.U.)

\* Correspondence: whidalgo@uis.edu.co; Tel.: +57-(7)-634-40-00 (ext. 2025)

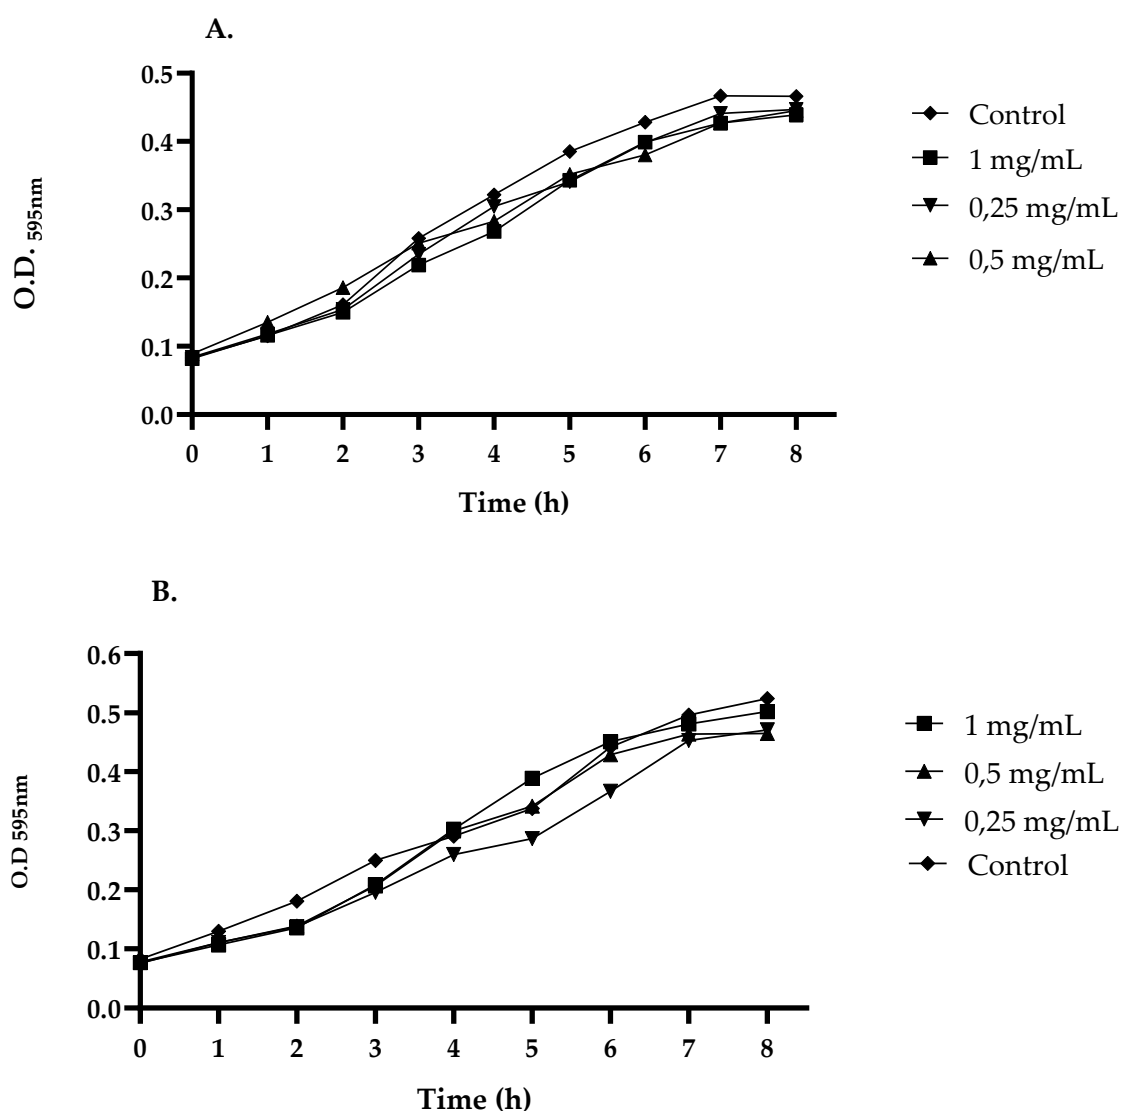

**Figure S1.** Growth kinetics assay of the antimicrobial effect of FME10 against (A) *S. aureus* ATCC 29213 and (B) *S. aureus* CMPUJ 015.

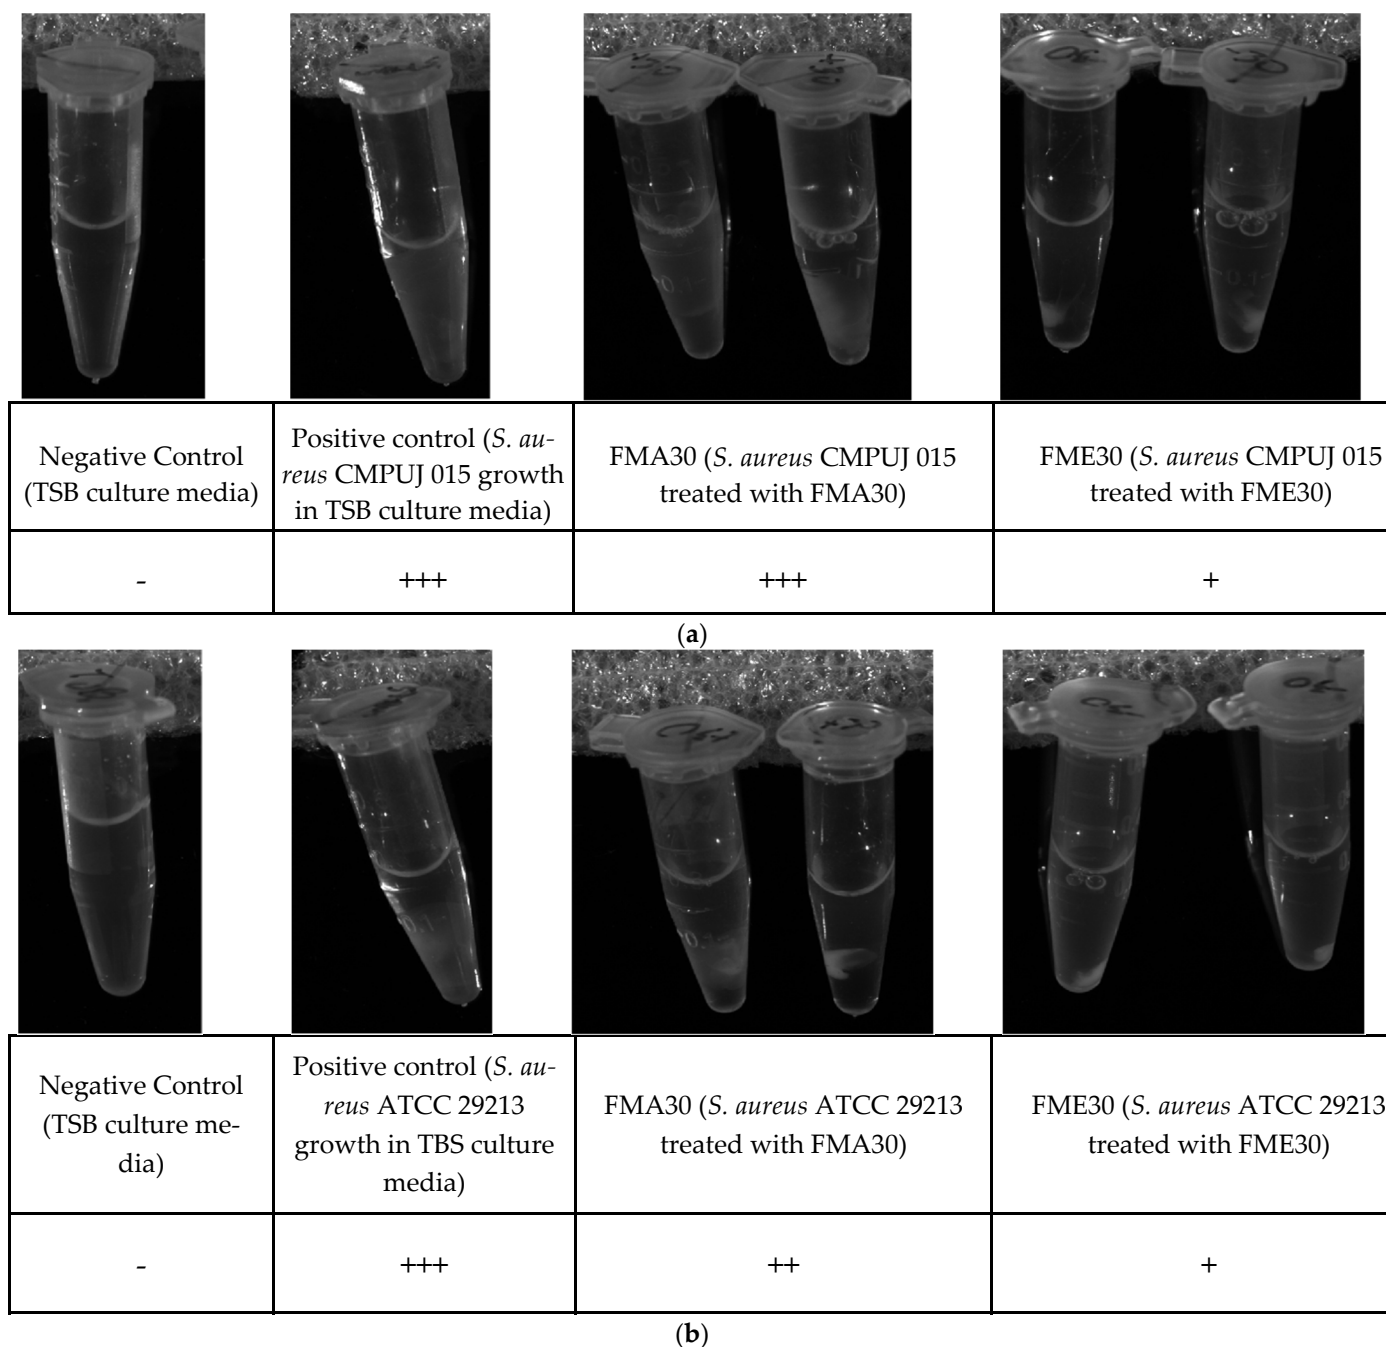

**Figure S2.** Inhibition of the coagulase production of *S. aureus* strains. (a) *S. aureus* CMPUJ 015 (b) *S. aureus* ATCC 29213. TBS (Tryptic Soy Broth) culture media. (+++) Total, (++) partial, (+) minimum presence of clots.

**Table S1.** Antibigram of *S. aureus* strains. The clinical tests were carried out by the service of Merced Lab, Bucaramanga, Colombia.

| Antibiotic            | <i>S. aureus</i> CMPUJ 015 |                | <i>S. aureus</i> ATTC 29213 |                |
|-----------------------|----------------------------|----------------|-----------------------------|----------------|
|                       | MIC (ug/mL)                | Interpretation | MIC (ug/mL)                 | Interpretation |
| Amox/A Clav           | ≤4/2                       | S              | ≤4/2                        | S              |
| Amp/Sulbactam         | >16/8                      | R              | 16/8                        | I              |
| Ampicillin            | >8                         | R              | >8                          | R              |
| Cefazolin             | ≤4                         | S              | ≤4                          | S              |
| Ciprofloxacin         | ≤1                         | S              | ≤1                          | S              |
| Clindamycin           | 1                          | I              | 1                           | I              |
| Daptomycin            | 1                          | S              | 1                           | S              |
| Erythromycin          | >4                         | R              | 2                           | I              |
| Gentamicin            | ≤4                         | S              | ≤4                          | S              |
| Induction Clindamycin | ≤4/0.5                     | NEG            | ≤4/0.5                      | NEG            |
| Levofloxacin          | ≤1                         | S              | ≤1                          | S              |
| Linezolid             | 4                          | S              | 4                           | S              |
| Moxifloxacin          | ≤0.5                       | S              | ≤0.5                        | S              |
| Nitrofurantoin        | ≤32                        |                | ≤32                         |                |
| Oxacillin             | 2                          | S              | 1                           | S              |
| Penicillin            | >8                         | R              | >8                          | R              |
| Rifampicin            | ≤1                         | S              | ≤1                          | S              |
| Cefoxitin Screening   | ≤4                         | NEG            | ≤4                          | NEG            |
| Synercid              | ≤1                         | S              | ≤1                          | S              |
| Tetracycline          | >8                         | R              | >8                          | R              |
| Trimet/Sulfa          | ≤0.5/9.5                   | S              | ≤0.5/9.5                    | S              |
| Vancomycin            | 2                          | S              | 2                           | S              |

S: sensible; I: intermediate sensitivity; R: resistant; NEG: Negative.
